# Supplementary material for: Transglutaminase 2 Depletion Attenuates α-Synuclein Mediated Toxicity in Mice
Source: PubMed Central journal article supplement (PMC8024061; doi:10.1016/j.neuroscience.2020.05.047), 2020-06-02

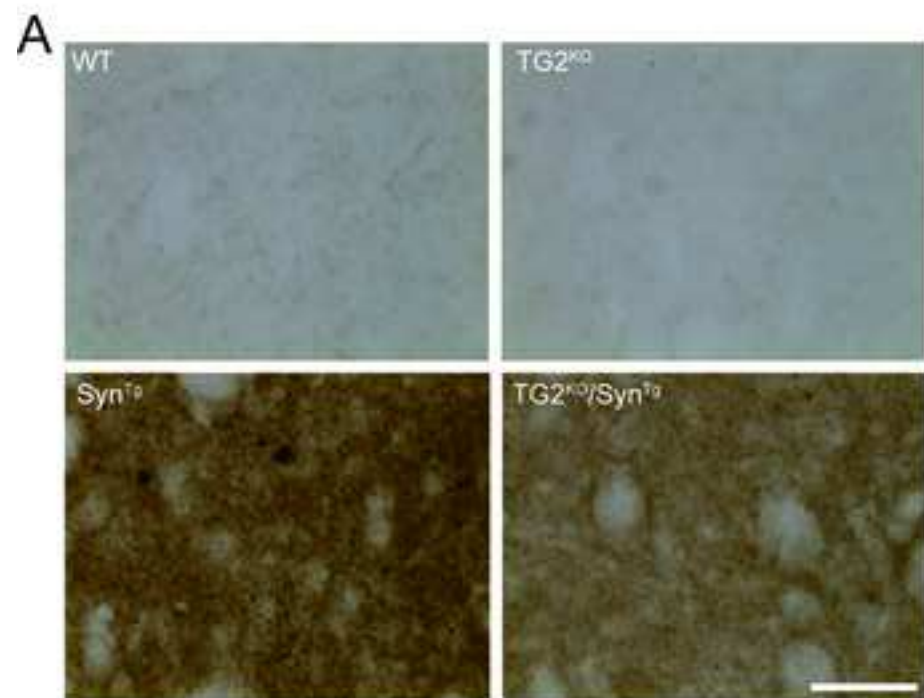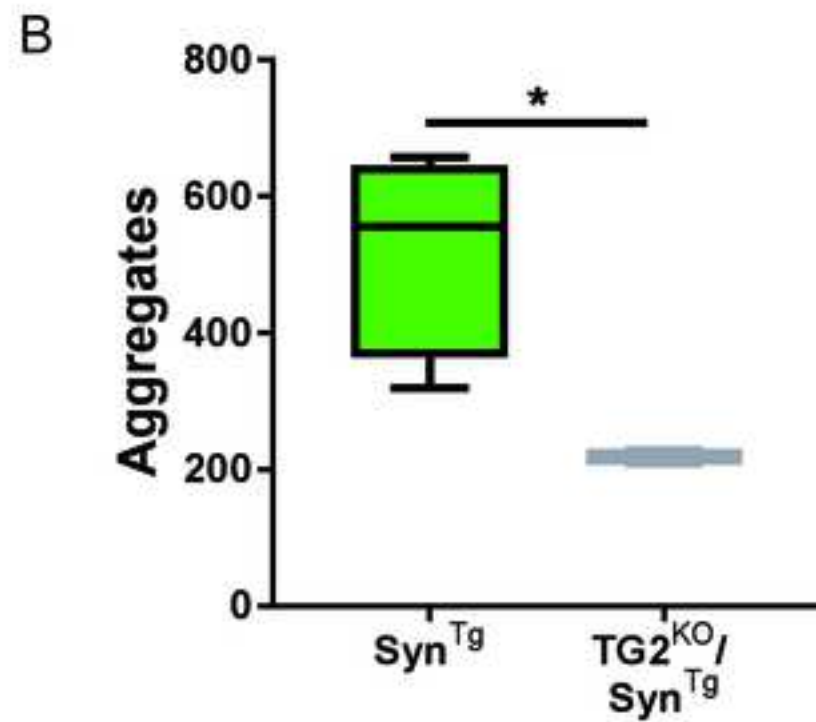

Supplement: NIHMS1683917-supplement-1.pdf [file NIHMS1683917-supplement-1.pdf]
